# Supplementary material
Source: MDPI journal article supplement (https://www.mdpi.com/2414-4088/2/3/60)
Supplement: s1 [file s1]

Archive with 2 entries (2 files):
- SupplementaryMaterial_InterviewTranscripts.pdf
- SupplementaryMaterial_ResultsSurvey.pdf
